# Supplementary material for: Lung Functioning and Inflammation in a Mouse Model of Systemic Juvenile Idiopathic Arthritis
Source: PubMed Central journal article supplement (PMC7996094; doi:10.3389/fimmu.2021.642778), 2021-03-12
Supplement: Data_Sheet_1.pdf [file Data_Sheet_1.pdf]

**Lung functioning and inflammation in a mouse model of systemic juvenile idiopathic arthritis**

Bert Malengier-Devlies<sup>1</sup>, Tatjana Decaestecker<sup>2</sup>, Kaat Dekoster<sup>3</sup>, Arno Vanstapel<sup>2</sup>, Kourosh Ahmadzadeh<sup>1</sup>, Fariba Poosti<sup>4</sup>, Tania Mitera<sup>1</sup>, Laura Seldeslachts<sup>3</sup>, Erik Verbeken<sup>5</sup>, Carine Wouters<sup>1,6,7</sup>, Greetje Vande Velde<sup>3</sup>, Jeroen Vanoirbeek<sup>2</sup>, Patrick Matthys<sup>1</sup>

<sup>1</sup> Laboratory of Immunobiology, Department of Microbiology and Immunology, KU Leuven, Leuven, Belgium

<sup>2</sup> Laboratory of Respiratory Diseases and Thoracic Surgery (BREATHE), Department of Chronic Diseases and Metabolism, KU Leuven, Leuven, Belgium

<sup>3</sup> Biomedical MRI, Department of Imaging & Pathology, KU Leuven, Leuven, Belgium

<sup>4</sup> Laboratory of Molecular Immunology, Department of Microbiology and Immunology, KU Leuven, Leuven, Belgium

<sup>5</sup> Morphology and Molecular Pathology Section, University Hospitals Leuven, Leuven, Belgium

<sup>6</sup> Division of Pediatric Rheumatology, University Hospitals Leuven, Leuven, Belgium

<sup>7</sup> European Reference Network for Rare Immunodeficiency, Autoinflammatory and Autoimmune Diseases (RITA) at University Hospital Leuven, Leuven, Belgium

Address for correspondence:

Patrick Matthys, Laboratory of Immunobiology, Rega Institute, KU Leuven, Herestraat 49 box 1044, 3000 Leuven, Belgium

Tel: +32 16 32 23 63

Email: [patrick.matthys@kuleuven.be](mailto:patrick.matthys@kuleuven.be)

**Supplementary Tables**  
**Supplementary Table 1**

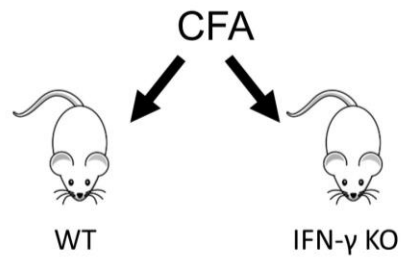

**sJIA characteristics**

**Clinical features**

|                                     |   |                |
|-------------------------------------|---|----------------|
| - Fever                             | - | -              |
| - Weight loss                       | + | ++             |
| - Arthritis                         | - | + <sup>a</sup> |
| - Skin rash                         | - | + <sup>a</sup> |
| - Splenomegaly                      | + | ++             |
| - Lymphadenopathy                   | + | +              |
| <b>Hematologic features</b>         |   |                |
| - Neutrophilia                      | + | ++             |
| - Thrombocytosis                    | + | ++             |
| - Lymphocytopenia                   | - | +              |
| - Anaemia                           | - | + <sup>a</sup> |
| <b>Immune/inflammatory features</b> |   |                |
| - Increased IL-6                    | - | +              |
| - Decreased NK cell functionality   | - | +              |

Features were graded as follows: +, present; ++, more pronounced present; and -, absent.

<sup>a</sup> In subsets of mice.

For WT and IFN-γ KO mice, a summary of more than 10 experiments was used to compose this table, and the list of features is founded on data published in Avau et al., Imbrechts et al. and Vandenhaute et al. (4–6)

**Supplementary Table 2**

| Antigen            | Fluorophore   | Clone       | Company        |
|--------------------|---------------|-------------|----------------|
| B220               | BV786         | RA3-6B2     | BD             |
| CD101              | Af647         | 307707      | BD             |
| CD103              | PerCpEF710    | 2E7         | eBioscience    |
| CD115              | PE            | AFS98       | eBioscience    |
| CD117              | PE-Cy5        | 2B8         | Biologend      |
| CD11b              | BUV395        | M1/70       | BD             |
| CD11b              | BUV395        | M1/70       | BD             |
| CD11c              | BV711         | N418        | Biologend      |
| CD11c              | BV711         | N418        | Biologend      |
| CD122              | BV421         | TM-b1       | BD             |
| CD16/32            | APC-Cy7       | 93          | Biologend      |
| CD163              | APC           | S150491     | Biologend      |
| CD19               | BV510         | 6D5         | Biologend      |
| CD19               | FITC          | eBio1D3     | eBioscience    |
| CD206              | BV605         | C068C2      | Biologend      |
| CD27               | FITC          | LG.7G9      | eBioscience    |
| CD3                | BV510         | 17A2        | Biologend      |
| CD3                | FITC          | 145-2C11    | eBioscience    |
| CD3                | BUV737        | 145-2C11    | BD             |
| CD34               | FITC          | RAM34       | BD             |
| CD4                | PerCp-Cy5.5   | RM4-5       | eBioscience    |
| CD4                | APC-ef780     | RM4.5       | eBioscience    |
| CD45               | PE            | 30-F11      | eBioscience    |
| CD64               | BV786         | X54-5/7.1   | BD             |
| CD8                | BV711         | 53-6.7      | BD             |
| CD80               | BV421         | 16-10A1     | BD             |
| CXCR2              | PerCp-Cy5.5   | SA045E1     | Biologend      |
| CXCR4              | BV605         | L276F12     | Biologend      |
| DX5                | FITC          | DX5         | eBioscience    |
| DX5                | PE-Cy5        | DX5         | eBioscience    |
| IL-17              | eF450         | eBio1787    | eBioscience    |
| IL-1 $\beta$       | PE            | REA577      | Milteny Biotec |
| IL-6               | FITC          | MP5-20F3    | eBioscience    |
| Ly6C               | APC-Cy7       | AL-21       | BD             |
| Ly6C               | PerCp-Cy5.5   | HK1.4       | eBioscience    |
| Ly6G               | BV786         | 1A8         | BD             |
| Ly6G               | FITC          | 1A8-LY6G    | eBioscience    |
| Ly6G               | BV786         | 1A8         | BD             |
| MHCII              | AlexaFluor700 | M5/114.14.2 | eBioscience    |
| SiglecF            | PE-CF594      | E50-2440    | BD             |
| TNF- $\alpha$      | APC           | MP6-XT22    | eBioscience    |
| $\Gamma\delta$ TCR | APC           | GL3         | Biologend      |
| $\Gamma\delta$ TCR | PE-Cy7        | GL3         | Biologend      |

**Supplementary Table 3**

| Gene          | Primer name         | Company       |
|---------------|---------------------|---------------|
| IL1 $\beta$   | Mm.PT.58.42940223   | IDT           |
| IL-6          | Mm. PT.58.10005566  | IDT           |
| TNF- $\alpha$ | Mm.PT.58.1257581    | IDT           |
| IL-17         | Mm.PT.58.6531092    | IDT           |
| IL-22         | Mm00444241_m1       | Thermo Fisher |
| IL-10         | Mm.PT.58.13531087   | IDT           |
| KC            | Mm.PT.58.42076891   | IDT           |
| MIP2          | Mm.PT.58.10456839   | IDT           |
| GCP2          | Mm00436451_g1       | Thermo Fisher |
| G-CSF         | Mm.PT58.7976206.gs  | IDT           |
| MCP1          | Mm.PT.58.42151692   | IDT           |
| GAPDH         | Mm.PT.39a.1         | IDT           |
| IFNA1         | Mm.PT.58.43426930.g | IDT           |
| IFNB1         | Mm.PT.58.30132453.g | IDT           |
| CXCL9         | Mm.PT.58.5726745    | IDT           |
| CXCL10        | Mm.PT.58.43575827   | IDT           |
| IFIT1         | Mm.PT.58.32674307   | IDT           |
| ISG15         | Mm.PT.58.41476392.g | IDT           |
| SIGLEC1       | Mm.PT.58.8446763    | IDT           |
